# Supplementary material
Source: PubMed Central journal article supplement (PMC3286214)
Supplement: supp_blood-2011-02-338210_Document1.pdf [file supp_blood-2011-02-338210_Document1.pdf]

Table S1

Transduction efficiency (%) of BM cells using stable viral producing lines (co-culture)

| BM cells transduced | 816V (%)      | 816Y(%)      | Wt (%)        | GFP (%)       |
|---------------------|---------------|--------------|---------------|---------------|
| MxCre-CM            | 12-79 (N = 7) | 10-78 (N =9) | 8-57 (N =10)  | 52-77 (N = 3) |
| wt                  | 12-47 (N = 6) | 9-69 (N = 6) | 15-43 (N = 6) | 34-56 (N = 2) |

N: number of experiments

Figure S1

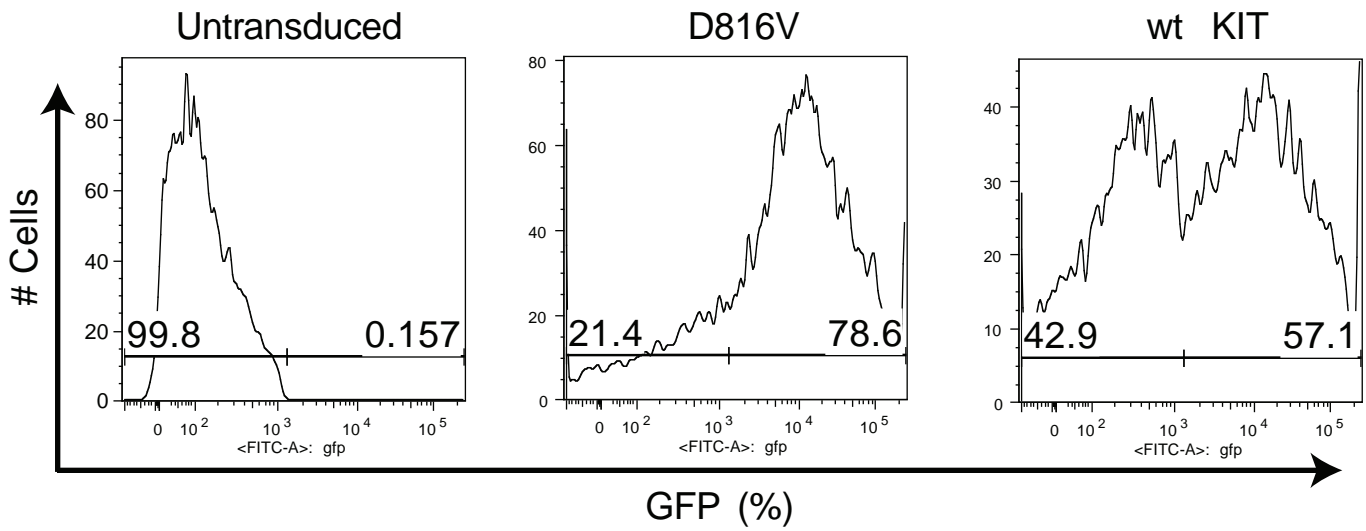

**Transduction efficiency of *Cbfb*<sup>+/-56m</sup>; *Tg*(Mx1-Cre) BM cells co-cultured with stable retroviral producing lines for D816V KIT or wt KIT. The Y-axis is the number of cells and the X-axis is GFP.**

Figure S2

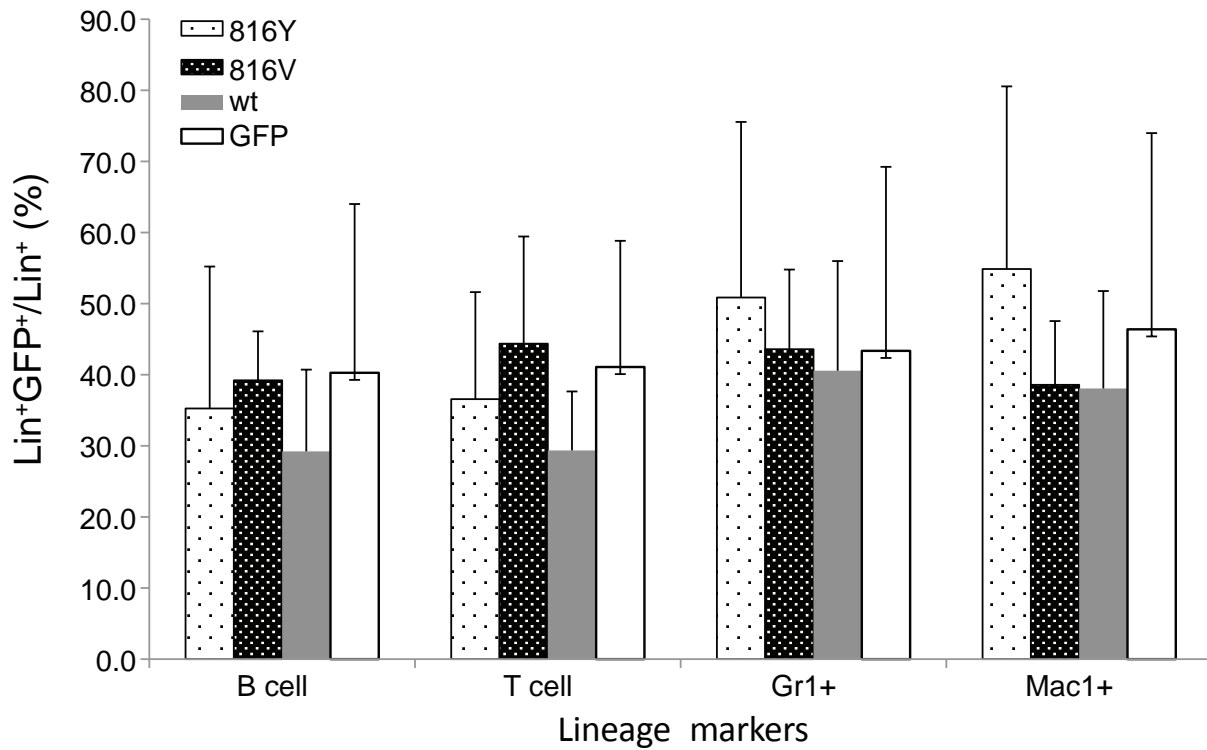

**Contribution of KIT or GFP vector transduced *Cbfb*<sup>+56m</sup>; *Tg(Mx1-Cre)* BM cells to different lineages in the peripheral blood, 12 weeks after transplantation.** White dotted bars, D816Y KIT (n = 12); black dotted bars: D816V KIT (n = 9); grey solid bars: wt KIT (n = 6); white solid bars: GFP vector (n = 7).

Figure S3

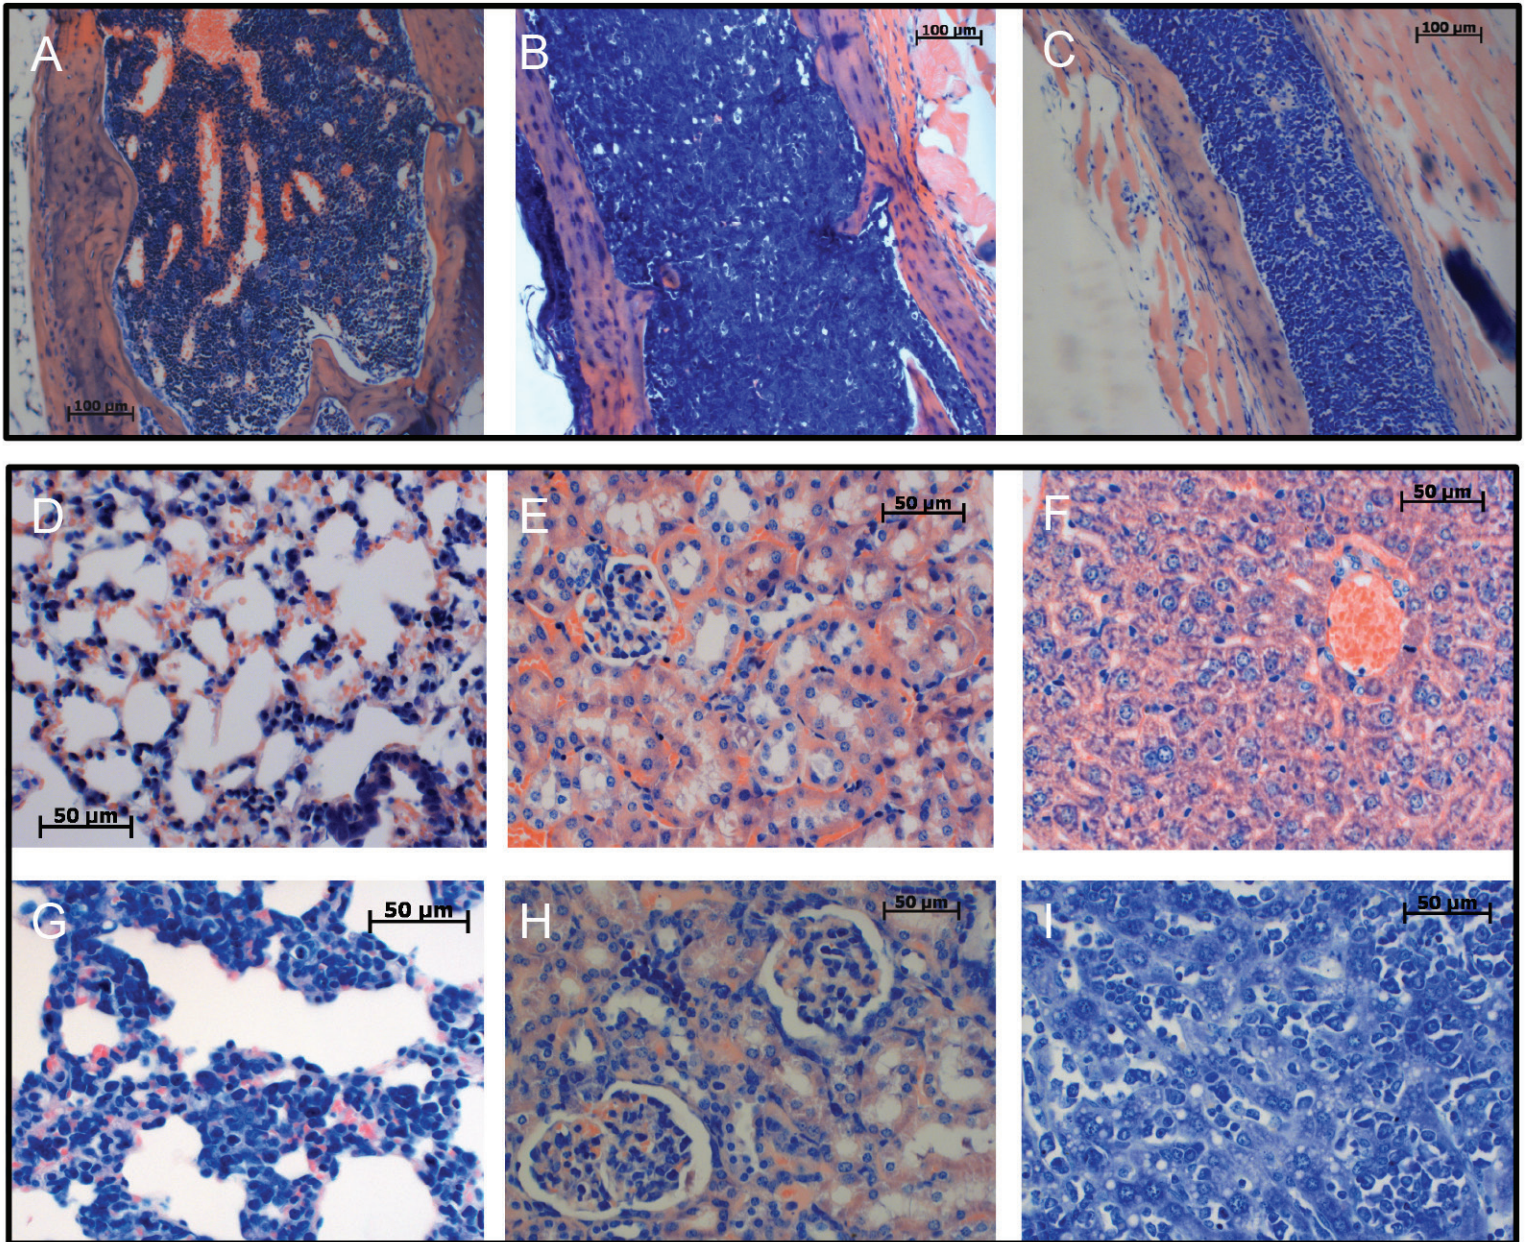

**Sections of leukemia infiltrated tissues by Wright-Giemsa staining. A:** WT BM; **B:** BM from Cbfb<sup>+/56m</sup>; Tg(Mx1-Cre)/KIT<sup>D816Y</sup> leukemic mouse; **C:** BM from secondary transplantation of Cbfb<sup>+/56m</sup>; Tg(Mx1-Cre)/KIT<sup>D816Y</sup> leukemic cells; **D:** WT lung; **E:** WT kidney; **F:** WT liver; **G:** lung from a Cbfb<sup>+/56m</sup>; Tg(Mx1-Cre)/KIT<sup>D816Y</sup> leukemic mouse; **H:** kidney from a Cbfb<sup>+/56m</sup>; Tg(Mx1-Cre)/KIT<sup>D816Y</sup> leukemic mouse; **I:** liver from a Cbfb<sup>+/56m</sup>; Tg(Mx1-Cre)/KIT<sup>D816Y</sup> leukemic mouse.
